# Supplementary material for: Land surface temperature trends derived from Landsat imagery in the Swiss Alps
Source: Copernicus journal article supplement (doi:10.5194/tc-18-5259-2024), 2024-11-19
Supplement: Supplementary file 1 [file tc-18-5259-2024-supplement.zip]

## Sheet: imis info
station	altitude asl [m]	utmX	utmY
ALI2	1708	345991	5.1503e+06
AMD2	1610	511131	5.22416e+06
ANV2	2640	386976	5.11601e+06
ANV3	2589	396190	5.10839e+06
ARO2	2847	379722	5.09842e+06
ARO3	2602	388833	5.10477e+06
ATT2	2550	366291	5.1072e+06
BED2	2450	462486	5.1535e+06
BED3	2101	463310	5.14873e+06
BEL2	2554	421135	5.13843e+06
BER2	2447	579087	5.14129e+06
BER3	2625	570354	5.14345e+06
BEV2	2512	564185	5.15434e+06
BOG2	2299	459333	5.13127e+06
BOR2	2517	431393	5.12671e+06
BOV2	2687	363466	5.09387e+06
CAM2	2216	478308	5.14583e+06
CAM3	2257	477657	5.14826e+06
CHA2	2218	358803	5.13757e+06
CMA2	2325	513987	5.18816e+06
CON2	2229	367068	5.12769e+06
CSL2	1455	350658	5.21997e+06
DAV2	2558	562645	5.17203e+06
DAV3	2455	559074	5.18199e+06
DAV4	2330	559897	5.18148e+06
DAV5	2315	560295	5.18231e+06
DIA2	2575	364694	5.13044e+06
DTR2	2057	489961	5.15437e+06
EGH2	2500	430200	5.14076e+06
ELA2	2726	554748	5.16001e+06
ELM2	2058	510390	5.19802e+06
ELS2	2143	395828	5.15379e+06
FAE2	1971	384582	5.15297e+06
FIR2	2111	428433	5.16878e+06
FIS2	2155	398192	5.14729e+06
FLU2	2394	572285	5.17812e+06
FNH2	2252	342643	5.10726e+06
FOU2	2800	350266	5.09273e+06
FRA2	2100	488701	5.13164e+06
FRA3	2170	486006	5.13317e+06
FUL2	2602	352599	5.11745e+06
FUS2	2390	470842	5.14261e+06
GAD2	2063	453976	5.17691e+06
GAN2	2710	404776	5.14249e+06
GLA2	1632	502857	5.20479e+06
GOM2	2439	441022	5.14105e+06
GOM3	2427	440794	5.14869e+06
GOR2	2953	405790	5.09334e+06
GRA2	1984	329450	5.13489e+06
GUT2	2115	445676	5.16977e+06
HTR2	2147	515666	5.15455e+06
HTR3	2200	526725	5.15372e+06
ILI2	2022	332384	5.1176e+06
JAU2	1707	367927	5.16583e+06
JUL2	2426	553143	5.14745e+06
KES2	2727	568762	5.16347e+06
KLO2	2147	566548	5.19544e+06
KLO3	2299	571040	5.18795e+06
LAG2	2730	557184	5.14447e+06
LAG3	2300	553615	5.14145e+06
LAU2	1970	375516	5.14266e+06
LHO2	2150	419075	5.15934e+06
LUK2	2555	483421	5.1612e+06
LUM2	2388	489412	5.17535e+06
MAE2	2162	419113	5.16333e+06
MEI2	2220	465703	5.17679e+06
MES2	2384	512319	5.14006e+06
MLB2	1974	546433	5.21518e+06
MTR2	1884	493666	5.13946e+06
MUN2	2205	417277	5.13162e+06
MUT2	2481	501333	5.18947e+06
NAR2	2077	489915	5.14661e+06
NAS2	2350	595765	5.18538e+06
NEN3	2203	371432	5.1113e+06
OBM2	2097	362791	5.14246e+06
OBW2	2432	447556	5.15486e+06
OBW3	2194	450475	5.15068e+06
OFE2	2359	598672	5.16505e+06
ORT2	1824	496844	5.19606e+06
OTT2	2017	389713	5.15502e+06
PAR2	2290	561358	5.189e+06
PMA2	2429	541174	5.15864e+06
PUZ2	2196	489470	5.16365e+06
RGS3	1258	497784	5.20858e+06
RNZ2	2400	471460	5.17029e+06
ROA2	1875	423193	5.18058e+06
ROT3	2495	546177	5.17568e+06
SAA2	2480	413495	5.11375e+06
SAA3	2952	421308	5.10872e+06
SAA4	2680	415443	5.10846e+06
SCA2	2032	478436	5.18442e+06
SCA3	2338	483205	5.19313e+06
SCB2	1777	431558	5.18104e+06
SCH2	2332	410713	5.15881e+06
SHE2	1852	409294	5.17794e+06
SIM2	2450	498528	5.14599e+06
SLF2	1563	564715	5.18471e+06
SMN2	2512	601830	5.20119e+06
SPN2	2620	431959	5.11992e+06
SPN3	2424	426303	5.11427e+06
STH2	1791	386790	5.1709e+06
STN2	2914	403546	5.11345e+06
TAM2	2468	529738	5.20172e+06
TAM3	2166	534903	5.19315e+06
TIT2	2149	454927	5.18155e+06
TRU2	2459	391212	5.13624e+06
TUJ2	2262	478874	5.17007e+06
TUJ3	2211	480121	5.16597e+06
TUM2	2191	501639	5.18084e+06
URS2	2169	462757	5.15936e+06
VAL2	2268	470392	5.15512e+06
VDS2	2385	374327	5.13107e+06
VIN2	2729	609832	5.19859e+06
VLS2	2064	515698	5.169e+06
WFJ2	2536	561722	5.18655e+06
YBR2	1701	486736	5.20912e+06
ZER2	2752	401535	5.09952e+06
ZER4	2408	399520	5.09464e+06
ZNZ2	2677	577894	5.17208e+06

## Sheet: landsat
station	malst	trend	amplitude	phase	rmse	nobs	dt	sensor	origin
ALI2	9.55423	-0.0655227	17.1955	0.513775	5.90895	362	14.5654	L578	landsat
AMD2	6.27051	0.115282	15.6471	0.499883	6.16645	316	21.3553	L578	landsat
ANV2	2.94024	0.0240029	18.5054	0.595008	7.07676	324	21.5305	L578	landsat
ANV3	4.58176	0.034534	20.2611	0.519104	7.10318	352	21.4648	L578	landsat
ARO2	2.55949	-0.00835794	16.2862	0.605176	6.9455	301	19.9973	L578	landsat
ARO3	2.34271	0.0245031	21.4304	0.475936	7.30542	328	19.9316	L578	landsat
ATT2	1.68911	-0.0136581	18.7079	0.529498	6.85018	154	7.66598	L578	landsat
BED2	1.58969	0.139646	14.402	0.699282	7.17577	430	22.5846	L578	landsat
BED3	2.78344	0.0463594	18.9077	0.517304	7.08536	591	21.5332	L578	landsat
BEL2	6.96875	-0.161985	18.9315	0.592898	7.36269	316	10.5133	L578	landsat
BER2	1.17996	0.0607946	17.5302	0.539385	6.74311	533	18.5106	L578	landsat
BER3	3.85431	-0.00314167	18.7184	0.570549	7.42089	480	18.5079	L578	landsat
BEV2	1.1686	0.0929332	20.2041	0.472091	6.99713	592	21.6181	L578	landsat
BOG2	7.90778	-0.0585324	17.6127	0.633359	8.10745	513	19.5592	L578	landsat
BOR2	0.103978	0.0407246	15.3639	0.564826	6.12434	455	17.6564	L578	landsat
BOV2	2.98595	-0.0394111	18.5337	0.493828	6.33482	257	17.4784	L578	landsat
CAM2	0.861375	0.0342676	17.0485	0.440662	6.59801	515	19.5592	L578	landsat
CAM3	21.7231	-1.05773	16.1274	0.404049	5.19444	169	4.4271	L578	landsat
CHA2	4.34592	0.0519497	16.3704	0.569406	5.904	505	21.6154	L578	landsat
CMA2	12.2317	-0.545458	16.7891	0.531258	6.86688	154	8.62972	L578	landsat
CON2	4.42184	0.00269657	17.3137	0.613507	7.22025	306	16.5366	L578	landsat
CSL2	-42.1661	2.87153	16.9464	0.478453	3.31847	34	1.18275	L578	landsat
DAV2	1.97644	0.0218623	17.0106	0.575752	7.3487	549	20.5449	L578	landsat
DAV3	1.83233	0.155969	17.4349	0.580633	7.63519	509	20.523	L578	landsat
DAV4	9.45873	-0.122228	17.9706	0.546758	7.6904	403	17.0596	L578	landsat
DAV5	3.978	-0.0130686	18.9802	0.388161	6.14161	372	17.0596	L578	landsat
DIA2	0.863383	-0.11454	12.4125	0.528637	6.11673	135	6.52703	L578	landsat
DTR2	5.8094	0.191596	18.3377	0.502198	7.49234	422	21.5332	L578	landsat
EGH2	4.2627	0.0541856	18.0462	0.625725	7.56975	232	7.70981	L578	landsat
ELA2	4.28495	-0.172602	17.0467	0.510005	7.48364	288	10.6913	L578	landsat
ELM2	4.58272	0.0687525	17.6425	0.510748	7.2819	269	18.2669	L578	landsat
ELS2	7.8475	-0.00945818	18.9843	0.4858	5.94897	301	20.2601	L578	landsat
FAE2	5.32608	0.0184801	17.3344	0.493054	6.29901	341	21.5524	L578	landsat
FIR2	6.28945	0.0272915	17.4676	0.617847	6.80857	544	20.5421	L578	landsat
FIS2	2.56507	0.0462201	17.4871	0.407601	5.79473	324	21.6181	L578	landsat
FLU2	2.94496	-0.049951	18.1983	0.471797	6.20087	390	15.6386	L578	landsat
FNH2	0.206112	0.056441	17.5227	0.45788	6.40005	519	21.5305	L578	landsat
FOU2	-4.63631	-0.0297828	13.6222	0.383498	4.84943	387	19.6222	L578	landsat
FRA2	4.76271	0.0303706	16.8074	0.527346	5.45526	225	14.4778	L578	landsat
FRA3	7.30886	0.272655	13.7585	0.443745	6.42853	258	13.5579	L578	landsat
FUL2	1.05789	0.0489778	16.0263	0.612577	7.09701	520	19.603	L578	landsat
FUS2	3.55998	-0.0418719	16.3939	0.530301	5.66987	389	17.588	L578	landsat
GAD2	3.52682	0.107178	17.5595	0.524351	6.44536	508	20.2163	L578	landsat
GAN2	0.705563	0.0703503	13.528	0.676731	7.70037	324	22.4504	L578	landsat
GLA2	5.76495	0.157166	17.851	0.507133	5.39251	323	18.2669	L578	landsat
GOM2	2.26337	0.0431435	19.2923	0.530588	6.64829	591	19.6277	L578	landsat
GOM3	2.10834	0.17825	17.8015	0.551392	7.37179	473	19.4962	L578	landsat
GOR2	-2.18604	0.0274254	18.2182	0.50255	6.95335	255	7.70981	L578	landsat
GRA2	3.77797	0.117096	15.7729	0.573907	5.62866	359	13.5551	L578	landsat
GUT2	5.0622	0.119873	18.1655	0.484055	7.11715	514	19.5811	L578	landsat
HTR2	4.91318	0.125608	18.603	0.551861	6.79975	257	17.5442	L578	landsat
HTR3	1.72335	0.0837085	17.9979	0.446025	6.44073	274	17.5442	L578	landsat
ILI2	6.3794	0.0494837	16.3329	0.403194	5.8587	468	18.6174	L578	landsat
JAU2	10.1466	-0.000569033	17.6141	0.493294	5.66241	370	14.3902	L578	landsat
JUL2	2.76615	0.0660737	18.5541	0.520473	7.50412	548	20.7639	L578	landsat
KES2	-0.677517	0.0709966	13.0912	0.584448	6.75569	489	21.64	L578	landsat
KLO2	4.24587	0.154495	19.0054	0.520141	7.32389	577	22.6038	L578	landsat
KLO3	0.202097	0.162467	18.7005	0.489226	7.59372	574	22.3382	L578	landsat
LAG2	0.509198	0.161897	17.3231	0.543144	8.06772	537	22.3409	L578	landsat
LAG3	4.83014	0.186155	19.0117	0.521514	6.85294	264	10.601	L578	landsat
LAU2	7.4138	-0.0116636	18.0067	0.477737	6.9847	302	19.384	L578	landsat
LHO2	4.38401	0.135981	19.7436	0.459629	7.33846	459	17.4784	L578	landsat
LUK2	0.0377316	0.0957823	14.2952	0.60351	6.50345	407	18.6366	L578	landsat
LUM2	-2.86752	0.201158	7.81368	-0.00202997	3.1977	32	20.9172	L578	landsat
MAE2	7.49935	-0.0236226	17.1109	0.536358	7.42591	223	6.78986	L578	landsat
MEI2	4.14152	0.119372	17.2744	0.569876	6.94011	522	21.577	L578	landsat
MES2	1.9479	0.0329666	16.5843	0.47988	5.8435	259	16.5147	L578	landsat
MLB2	4.51582	-0.154309	18.2392	0.374546	5.86574	236	10.4257	L578	landsat
MTR2	13.9706	-0.303572	13.192	0.360456	4.86641	139	6.78986	L578	landsat
MUN2	8.92962	0.0730346	20.2086	0.449737	6.95109	514	18.5079	L578	landsat
MUT2	4.47218	-0.207405	16.0477	0.538515	7.74282	195	10.601	L578	landsat
NAR2	2.2404	0.245194	14.5449	0.619119	6.96788	286	22.56	L578	landsat
NAS2	15.398	-0.504424	20.2979	0.444454	6.78433	277	8.73923	L578	landsat
NEN3	10.569	-0.407364	19.5683	0.421429	6.43883	137	5.49758	L578	landsat
OBM2	3.66971	0.0531886	16.8864	0.51669	5.87038	460	18.5079	L578	landsat
OBW2	4.3225	0.0138982	17.3562	0.654841	7.1072	515	19.5592	L578	landsat
OBW3	1.12845	0.0834829	18.5935	0.50338	6.97864	549	19.5838	L578	landsat
OFE2	2.77728	0.00205572	20.1398	0.447385	6.20763	469	16.6872	L578	landsat
ORT2	10.0369	0.0190616	15.6325	0.473036	6.02843	425	18.5051	L578	landsat
OTT2	6.01629	0.0945749	18.2809	0.487963	6.27545	286	21.3115	L578	landsat
PAR2	0.784621	0.144491	18.4282	0.480875	7.48046	543	21.4182	L578	landsat
PMA2	6.32699	-0.085302	17.5506	0.476268	7.24178	261	8.67353	L578	landsat
PUZ2	1.29389	0.127458	18.2772	0.464113	6.50016	408	22.3656	L578	landsat
RGS3	-10.6269	1.14492	17.1934	0.186438	5.57469	54	1.64541	L578	landsat
RNZ2	1.51493	-0.0855722	15.6023	0.519144	5.02783	230	9.53047	L578	landsat
ROA2	7.255	0.143651	16.8981	0.526657	6.98017	519	22.4313	L578	landsat
ROT3	546.141	-28.8416	14.9913	-0.0951422	4.40056	21	0.569473	L578	landsat
SAA2	6.014	0.00636564	19.051	0.449297	6.54071	562	21.6208	L578	landsat
SAA3	-4.9986	0.0339461	15.9832	0.436355	5.35292	602	21.6208	L578	landsat
SAA4	0.476347	0.108419	16.5588	0.519998	6.32566	248	7.64408	L578	landsat
SCA2	-1.14314	0.109971	19.2594	0.390677	7.06501	543	19.6934	L578	landsat
SCA3	0.391817	0.148463	15.2595	0.586674	7.62	438	19.7591	L578	landsat
SCB2	6.28124	0.0638329	18.2974	0.514665	6.685	481	18.6858	L578	landsat
SCH2	4.30405	0.0114593	16.4377	0.587303	6.73417	338	22.4504	L578	landsat
SHE2	7.86409	-0.00715415	17.0522	0.540028	6.03117	251	17.6099	L578	landsat
SIM2	3.1302	0.105353	17.6029	0.52923	6.1329	331	22.56	L578	landsat
SLF2	7.06292	0.149177	21.0419	0.21035	7.06081	567	21.4182	L578	landsat
SMN2	-0.204927	0.00540095	18.7803	0.470368	7.75063	465	18.5079	L578	landsat
SPN2	3.47888	0.0130275	15.7317	0.54045	6.8686	469	22.601	L578	landsat
SPN3	-0.549262	-0.0114468	14.6152	0.479033	5.5249	500	22.56	L578	landsat
STH2	6.62966	0.0209497	17.8014	0.480909	5.39116	262	18.2232	L578	landsat
STN2	-1.10578	0.0666423	12.5089	0.590657	6.67679	346	20.3477	L578	landsat
TAM2	-0.150664	0.117118	15.95	0.477983	6.43782	229	18.5298	L578	landsat
TAM3	3.40588	0.123767	18.6331	0.411287	6.15173	262	18.642	L578	landsat
TIT2	3.02069	0.0487738	18.1386	0.523677	6.41848	218	7.71252	L578	landsat
TRU2	2.62652	0.0226634	17.2526	0.62219	7.80774	341	22.2533	L578	landsat
TUJ2	5.82441	0.0643177	18.2975	0.595782	7.80753	513	21.577	L578	landsat
TUJ3	1.81442	0.0103426	18.5652	0.463482	6.33818	578	21.4648	L578	landsat
TUM2	7.15597	0.00630597	18.5779	0.585762	7.26268	245	16.5366	L578	landsat
URS2	2.11833	0.0757994	18.4227	0.456791	6.15358	574	21.421	L578	landsat
VAL2	7.58676	0.106553	16.2765	0.600501	7.44524	530	22.56	L578	landsat
VDS2	3.84222	-0.00837841	18.2229	0.614776	7.21439	317	20.1725	L578	landsat
VIN2	-1.76841	0.0878011	16.6217	0.401539	6.9735	448	20.6133	L578	landsat
VLS2	2.73404	0.128612	17.8858	0.36692	6.31665	289	17.807	L578	landsat
WFJ2	1.74199	0.140725	17.6931	0.542618	7.69399	494	19.7564	L578	landsat
YBR2	4.02616	0.181499	18.9298	0.417052	5.42077	321	12.5503	L578	landsat
ZER2	1.90357	0.06504	18.0175	0.57197	7.68803	555	20.3477	L578	landsat
ZER4	4.09128	-0.00576087	21.3119	0.441029	6.45559	408	14.4997	L578	landsat
ZNZ2	-1.79069	0.00392614	16.1199	0.463446	6.68721	415	16.6489	L578	landsat

## Sheet: imis
station	malst	trend	amplitude	phase	rmse	nobs	dt	sensor	origin
ALI2	7.7844	0.00361541	16.4156	0.524541	5.01452	362	14.5654	L578	imis
AMD2	5.7786	0.12161	15.0537	0.488142	5.33102	317	21.3553	L578	imis
ANV2	3.43698	0.0134142	18.1167	0.564625	6.83207	324	21.5305	L578	imis
ANV3	2.70042	0.0160606	18.0076	0.473444	5.53323	352	21.4648	L578	imis
ARO2	-1.16335	0.0621188	13.2352	0.481578	5.78032	301	19.9973	L578	imis
ARO3	0.331972	0.112828	19.3472	0.442759	5.70575	328	19.9316	L578	imis
ATT2	-1.88336	0.261604	18.3347	0.527531	7.35474	154	7.66598	L578	imis
BED2	0.521944	0.114066	14.5524	0.581779	6.86567	430	22.5846	L578	imis
BED3	1.25862	0.134102	18.0163	0.46409	6.59722	592	21.5332	L578	imis
BEL2	3.82083	0.0305874	17.6488	0.52003	6.60195	316	10.5133	L578	imis
BER2	0.833849	0.130088	16.5704	0.526566	6.30602	534	18.5106	L578	imis
BER3	4.12784	0.0388597	17.6827	0.552715	6.09521	481	18.5079	L578	imis
BEV2	-0.0962515	0.0689476	18.8905	0.428899	6.28112	592	21.6181	L578	imis
BOG2	6.14078	-0.0232747	16.942	0.565077	6.84449	514	19.5592	L578	imis
BOR2	-0.591294	0.0430821	13.4535	0.574328	6.08599	455	17.6564	L578	imis
BOV2	2.30794	-0.00732534	18.6547	0.44553	6.44763	257	17.4784	L578	imis
CAM2	1.45813	-0.0174414	16.8586	0.426964	5.74914	518	19.5592	L578	imis
CAM3	11.5012	-0.49259	17.0459	0.352395	6.24899	169	4.4271	L578	imis
CHA2	4.18695	0.0336167	15.4685	0.552947	5.68332	505	21.6154	L578	imis
CMA2	4.15479	-0.0304767	14.5024	0.510938	6.00737	154	8.62972	L578	imis
CON2	3.26305	0.110119	16.0516	0.571273	6.48064	306	16.5366	L578	imis
CSL2	-3.49053	0.791565	15.2645	0.500719	3.49296	34	1.18275	L578	imis
DAV2	1.23758	0.00312116	15.49	0.563881	6.89781	549	20.5449	L578	imis
DAV3	1.54113	0.0704773	16.0924	0.499077	6.68449	510	20.523	L578	imis
DAV4	4.68224	0.0127571	17.6648	0.448033	6.44839	403	17.0596	L578	imis
DAV5	7.55262	-0.127737	19.6664	0.42187	6.58592	372	17.0596	L578	imis
DIA2	-3.70488	0.225752	11.1981	0.487265	5.58185	135	6.52703	L578	imis
DTR2	3.82741	0.159035	17.0115	0.454863	5.32907	423	21.5332	L578	imis
EGH2	2.55587	0.123045	17.0256	0.572647	6.98963	232	7.70981	L578	imis
ELA2	0.193401	-0.0207827	14.3457	0.38493	5.85385	288	10.6913	L578	imis
ELM2	3.10153	0.0667685	15.8329	0.514272	6.82128	269	18.2669	L578	imis
ELS2	7.41881	-0.0226463	17.9825	0.439733	5.70933	301	20.2601	L578	imis
FAE2	6.10349	0.0234004	15.598	0.527625	5.44824	341	21.5524	L578	imis
FIR2	6.02866	0.0154445	17.8994	0.582666	7.111	544	20.5421	L578	imis
FIS2	4.32328	0.00617888	18.3282	0.443181	6.46397	324	21.6181	L578	imis
FLU2	1.1189	0.108032	17.1036	0.517671	6.55018	390	15.6386	L578	imis
FNH2	-0.206186	0.0938956	16.8349	0.415732	6.74149	519	21.5305	L578	imis
FOU2	-1.70592	-0.0941906	10.9249	0.350106	5.55358	387	19.6222	L578	imis
FRA2	4.10644	0.140975	16.3145	0.560659	5.72668	225	14.4778	L578	imis
FRA3	11.9549	0.102467	14.6216	0.484603	7.70668	258	13.5579	L578	imis
FUL2	-1.35117	0.0851277	13.7573	0.633126	7.04563	520	19.603	L578	imis
FUS2	4.16146	-0.0356517	17.2666	0.565262	5.96931	389	17.588	L578	imis
GAD2	3.96213	0.110882	18.1229	0.550538	7.08622	508	20.2163	L578	imis
GAN2	-0.386612	0.101499	10.6192	0.591592	7.16169	324	22.4504	L578	imis
GLA2	5.32493	0.177425	17.0103	0.528228	5.81054	323	18.2669	L578	imis
GOM2	0.370804	0.073964	17.2596	0.502617	6.05171	591	19.6277	L578	imis
GOM3	2.4373	0.21252	17.4975	0.558823	6.74439	474	19.4962	L578	imis
GOR2	-3.91391	0.16755	16.6613	0.448159	6.73271	255	7.70981	L578	imis
GRA2	4.42386	0.136929	16.6094	0.575505	6.17674	359	13.5551	L578	imis
GUT2	4.76293	0.117769	17.1058	0.466206	6.28984	515	19.5811	L578	imis
HTR2	4.50561	0.132945	18.1033	0.539224	6.26084	257	17.5442	L578	imis
HTR3	3.70856	0.0429937	18.0436	0.435353	5.77709	275	17.5442	L578	imis
ILI2	4.68667	0.0860249	15.7973	0.449251	5.32532	468	18.6174	L578	imis
JAU2	7.86161	0.0554215	16.6412	0.532266	5.31733	370	14.3902	L578	imis
JUL2	1.4664	0.06784	16.2043	0.432006	5.62538	549	20.7639	L578	imis
KES2	-2.26775	0.15354	12.7873	0.491825	6.04283	490	21.64	L578	imis
KLO2	5.56197	0.0927534	19.0258	0.514117	6.80409	578	22.6038	L578	imis
KLO3	0.0746094	0.172518	16.7023	0.441374	6.66647	575	22.3382	L578	imis
LAG2	-0.208742	0.154413	18.7846	0.607994	8.91268	539	22.3409	L578	imis
LAG3	10.7819	-0.65223	17.6242	0.174656	7.5314	264	10.601	L578	imis
LAU2	5.3181	0.0138852	16.6143	0.443738	5.72452	302	19.384	L578	imis
LHO2	3.77893	0.140064	19.2252	0.430152	6.60228	460	17.4784	L578	imis
LUK2	0.31623	0.0458149	14.3144	0.594074	7.06739	407	18.6366	L578	imis
LUM2	-1.93866	0.218885	6.93099	0.0425564	3.27058	32	20.9172	L578	imis
MAE2	5.48191	0.0260048	14.3162	0.51518	5.63394	223	6.78986	L578	imis
MEI2	3.95161	0.0794245	17.1017	0.526928	6.02153	523	21.577	L578	imis
MES2	0.123384	0.0769624	14.815	0.485531	5.16984	259	16.5147	L578	imis
MLB2	5.12659	-0.232291	17.5878	0.371013	5.82841	236	10.4257	L578	imis
MTR2	7.767	0.192043	18.3463	0.325437	6.60258	139	6.78986	L578	imis
MUN2	5.76095	0.105641	18.3392	0.45803	5.2909	515	18.5079	L578	imis
MUT2	1.20287	-0.025332	14.1231	0.476445	6.59236	195	10.601	L578	imis
NAR2	5.92895	0.113182	16.0036	0.672429	6.22084	287	22.56	L578	imis
NAS2	5.6672	-0.102665	19.1862	0.356515	5.96118	277	8.73923	L578	imis
NEN3	12.4146	-0.476712	19.0018	0.383514	6.14243	137	5.49758	L578	imis
OBM2	3.49246	0.0557755	15.4245	0.551953	5.78376	460	18.5079	L578	imis
OBW2	3.5618	0.026872	17.3044	0.56795	6.88886	515	19.5592	L578	imis
OBW3	1.77769	0.0182127	16.7697	0.455111	5.57378	550	19.5838	L578	imis
OFE2	3.97469	-0.017698	19.8128	0.447506	6.16681	469	16.6872	L578	imis
ORT2	6.82899	0.0308947	16.6017	0.513243	6.09587	425	18.5051	L578	imis
OTT2	6.21202	0.103249	17.938	0.499038	6.2844	286	21.3115	L578	imis
PAR2	1.05979	0.151574	16.6861	0.459536	6.71034	544	21.4182	L578	imis
PMA2	4.11909	0.00118501	15.94	0.428338	6.14214	261	8.67353	L578	imis
PUZ2	4.46631	0.119801	19.7866	0.445727	6.4218	409	22.3656	L578	imis
RGS3	-44.9497	2.95742	20.2214	0.216967	6.19283	54	1.64541	L578	imis
RNZ2	2.01029	-0.0770189	16.3126	0.501338	6.16495	230	9.53047	L578	imis
ROA2	6.69252	0.0669846	16.016	0.508287	5.45398	520	22.4313	L578	imis
ROT3	1433.06	-75.1425	25.2845	-0.406464	3.95793	21	0.569473	L578	imis
SAA2	7.67809	-0.0276536	20.5091	0.502213	6.51036	563	21.6208	L578	imis
SAA3	1.71648	-0.0955978	19.2099	0.367353	6.21816	602	21.6208	L578	imis
SAA4	0.381359	0.0776729	16.4392	0.508871	6.56315	248	7.64408	L578	imis
SCA2	-0.282916	0.0629096	18.982	0.365532	6.82468	544	19.6934	L578	imis
SCA3	0.772418	0.151723	13.8314	0.633012	7.20371	439	19.7591	L578	imis
SCB2	5.51445	0.0687284	17.1983	0.514661	5.86522	482	18.6858	L578	imis
SCH2	1.11665	0.0401058	14.5369	0.604885	6.19155	339	22.4504	L578	imis
SHE2	8.7947	-0.0211685	16.8366	0.553256	6.27701	251	17.6099	L578	imis
SIM2	3.09464	0.119487	17.5871	0.567902	6.57317	331	22.56	L578	imis
SLF2	5.19777	0.133179	19.2907	0.238372	5.78677	569	21.4182	L578	imis
SMN2	-1.68393	0.0605623	18.524	0.403254	6.50462	466	18.5079	L578	imis
SPN2	2.30383	0.0569634	15.3393	0.4569	5.60714	470	22.601	L578	imis
SPN3	-1.16775	-0.0156953	13.762	0.470631	6.11226	500	22.56	L578	imis
STH2	5.40803	0.00821503	16.1431	0.498372	5.06754	262	18.2232	L578	imis
STN2	0.926847	0.0679965	13.1736	0.567998	6.56397	346	20.3477	L578	imis
TAM2	-0.45448	0.110241	14.3734	0.506939	6.59831	229	18.5298	L578	imis
TAM3	1.00097	0.0871339	17.3508	0.345271	6.23459	262	18.642	L578	imis
TIT2	1.39107	0.159952	17.0075	0.519625	6.53614	218	7.71252	L578	imis
TRU2	2.22994	0.0248327	16.0127	0.606824	6.95849	342	22.2533	L578	imis
TUJ2	5.98269	0.0846351	16.2375	0.577502	6.0031	514	21.577	L578	imis
TUJ3	-0.39257	0.181687	17.0661	0.459279	6.30849	578	21.4648	L578	imis
TUM2	5.69543	0.073148	17.6023	0.489021	6.27236	245	16.5366	L578	imis
URS2	3.47934	0.0787642	17.7677	0.419498	5.56963	575	21.421	L578	imis
VAL2	5.00407	0.0949248	15.9326	0.618769	6.71545	531	22.56	L578	imis
VDS2	3.51193	0.0236415	16.6858	0.61117	6.94602	317	20.1725	L578	imis
VIN2	-1.01842	0.101127	17.3191	0.367885	7.30235	449	20.6133	L578	imis
VLS2	1.88763	0.101868	19.3664	0.323762	5.67338	290	17.807	L578	imis
WFJ2	-0.466933	0.185191	15.5424	0.459901	6.56843	495	19.7564	L578	imis
YBR2	2.42406	0.290473	19.0644	0.370078	5.55926	321	12.5503	L578	imis
ZER2	-0.320816	0.173791	15.494	0.556868	6.00225	556	20.3477	L578	imis
ZER4	6.56568	-0.160682	19.9976	0.453402	6.25791	408	14.4997	L578	imis
ZNZ2	-2.50651	0.0547681	16.5567	0.432081	7.21731	415	16.6489	L578	imis

## Sheet: validation
sensor	accurancy_mean	accurancy_median	precision_mean	precision_median	uncertainty
L578	-0.023276	-0.00733633	0.131741	0.0352578	0.133782
