# Supplementary material for: Land surface temperature trends derived from Landsat imagery in the Swiss Alps
Source: Copernicus journal article supplement (doi:10.5194/tc-18-5259-2024), 2024-11-19
Supplement: Supplementary file 2 [file tc-18-5259-2024-supplement.zip]

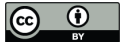

## *Supplement of*

# **Land surface temperature trends derived from Landsat imagery in the Swiss Alps**

**Deniz Tobias Gök et al.**

*Correspondence to:* Deniz Tobias Gök ([d\\_goek@gfz-potsdam.de](mailto:d_goek@gfz-potsdam.de))

- [tc-18-5259-2024-supplement-title-page.pdf](#)
- [S1\\_imis\\_landsat\\_trends\\_L578.xlsx](#)
- [S2\\_landsat\\_timeseries\\_model\\_allstations.pdf](#)
- [S3\\_supplementary\\_material.docx](#)
- [Supplementary\\_material\\_README.docx](#)

The copyright of individual parts of the supplement might differ from the article licence.
